# Supplementary material for: Blending with Poly(l-lactic acid) Improves the Printability of Poly(l-lactide-co-caprolactone) and Enhances the Potential Application in Cartilage Tissue Engineering
Source: PubMed Central journal article supplement — ACS Omega. 2021 Jul 8;6(28):18300–13. doi: 10.1021/acsomega.1c02190 (PMC8296602; doi:10.1021/acsomega.1c02190), 2021-07-08
Supplement: ao1c02190_si_001.pdf [file ao1c02190_si_001.pdf]

## Supporting information

Blending with poly(L-lactic acid) improves the printability of poly(L-lactide-co-caprolactone) and enhances the potential application in cartilage tissue engineering

Ruiping Duan<sup>1,#</sup>, Yimeng Wang<sup>1,#</sup>, Yiyun Zhang<sup>1,#</sup>, Ziqiang Wang<sup>1,#</sup>, Fuchong Du<sup>1</sup>, Bo Du<sup>1</sup>, Danning Su<sup>1</sup>, Lingrong Liu<sup>1</sup>, Xuemin Li<sup>1,\*</sup>, Qiqing Zhang<sup>1,2,\*</sup>

<sup>1</sup> The Key Laboratory of Biomedical Material of Tianjin, Biomedical Barriers Research Center, Chinese Academy of Medical Sciences & Peking Union Medical College Institute of Biomedical Engineering, Tianjin 300192, P.R. China

<sup>2</sup> Institute of Biomedical Engineering, the Second Clinical Medical College, Jinan University (Shenzhen People's Hospital), Shenzhen 518020, Guangdong, P.R. China

# These authors contributed equally.

\* Corresponding author: [lixuemin-7205@vip.sina.com](mailto:lixuemin-7205@vip.sina.com) and [zhangqiq@126.com](mailto:zhangqiq@126.com)

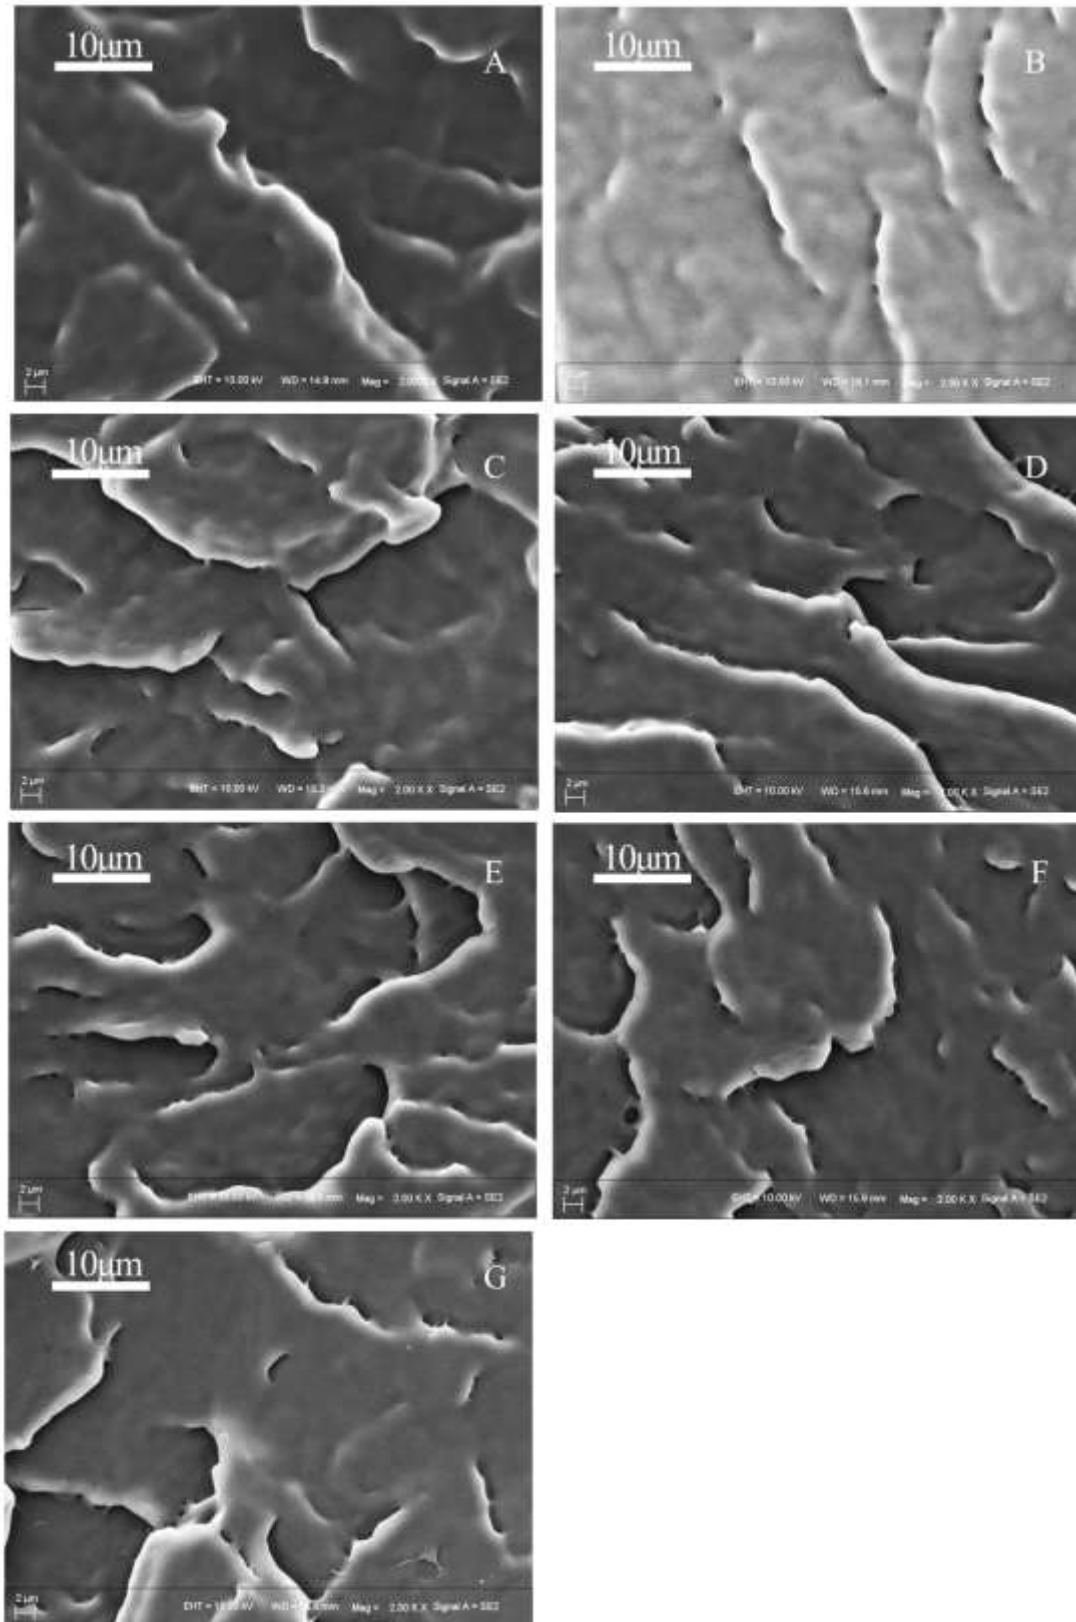

**Figure S1.** SEM images of the surfaces of the embrittled-broken samples. A, PLCL; B-G, PLCL/PLLA blends at different ratios; B, 10%PLLA; C, 20%PLLA; D, 30%PLLA; E, 40%PLLA; F, 50%PLLA; G, PLLA.

As shown in Figure S1, they were the SEM micrographs with high magnifications of cryo-fractured surfaces of PLCL/PLLA blends, corresponding to the Figure 4 in article.

**Table S1.** The difference in tensile properties of PLCL/PLLA blends.

| Group        |              | P       |                 |              |
|--------------|--------------|---------|-----------------|--------------|
|              |              | E       | $\sigma_{\max}$ | $\epsilon_u$ |
| PLCL         | PLCL90PLLA10 | 0.0208  | 0.0013          | 0.0021       |
|              | PLCL80PLLA20 | 0.0062  | 0.0019          | 0.0020       |
|              | PLCL70PLLA30 | <0.0001 | 0.0125          | 0.0018       |
|              | PLCL60PLLA40 | <0.0001 | 0.2032          | 0.0006       |
|              | PLCL50PLLA50 | <0.0001 | 0.9413          | <0.0001      |
|              | PLLA         | <0.0001 | 0.0008          | <0.0001      |
| PLCL90PLLA10 | PLCL80PLLA20 | 0.2374  | 0.9134          | 0.3449       |
|              | PLCL70PLLA30 | <0.0001 | 0.5446          | 0.1576       |
|              | PLCL60PLLA40 | <0.0001 | 0.1082          | 0.0201       |
|              | PLCL50PLLA50 | <0.0001 | 0.0072          | <0.0001      |
|              | PLLA         | <0.0001 | 0.0104          | <0.0001      |
| PLCL80PLLA20 | PLCL70PLLA30 | <0.0001 | 0.518           | 0.5301       |
|              | PLCL60PLLA40 | <0.0001 | 0.1084          | 0.1194       |
|              | PLCL50PLLA50 | <0.0001 | 0.0082          | 0.0005       |
|              | PLLA         | <0.0001 | 0.0124          | <0.0001      |
| PLCL70PLLA30 | PLCL60PLLA40 | 0.0004  | 0.2689          | 0.3777       |
|              | PLCL50PLLA50 | <0.0001 | 0.0284          | 0.0035       |
|              | PLLA         | <0.0001 | 0.0102          | <0.0001      |
| PLCL60PLLA40 | PLCL50PLLA50 | 0.0022  | 0.2465          | 0.007        |
|              | PLLA         | <0.0001 | 0.0053          | <0.0001      |
| PLCL50PLLA50 | PLLA         | <0.0001 | 0.0013          | <0.0001      |

Note: E, elastic modulus;  $\sigma_{\max}$ , tensile strength;  $\epsilon_u$ , the ultimate strain or elongation at break.

As shown in Table S1, all data were expressed as the mean  $\pm$  standard deviation (SD). Unpaired T test was performed to assess the statistical significance of differences between groups. The results of statistical analyses were performed using GraphPad Prism (version 7, GraphPad software Inc., San Diego, CA, USA) software based on statistically independent observations, and differences were considered statistically significant when the p-value was less than 0.05.

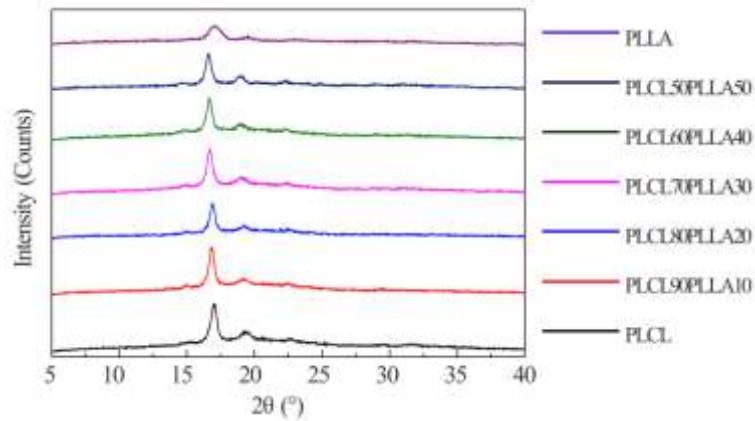

**Figure S2.** X-ray diffraction patterns of the filaments of PLCL/PLLA blends

In order to exploit the crystalline types of the samples, a wide-angle X-ray diffraction (XRD, Rigaku Ultima IV) was performed by using an angle range  $2\theta=5-40^\circ$  at 40 kV and 40mA. XRD patterns of the samples were obtained and showed in Figure S2. From the XRD spectra (Figure S2), it could be seen there were two main diffraction peaks at  $2\theta$  angles of  $17.0$  and  $19.4^\circ$  for all PLCL/PLLA blends. This result indicated that the crystallinity in blends do not vary substantially, which was consistent with the DSC results.

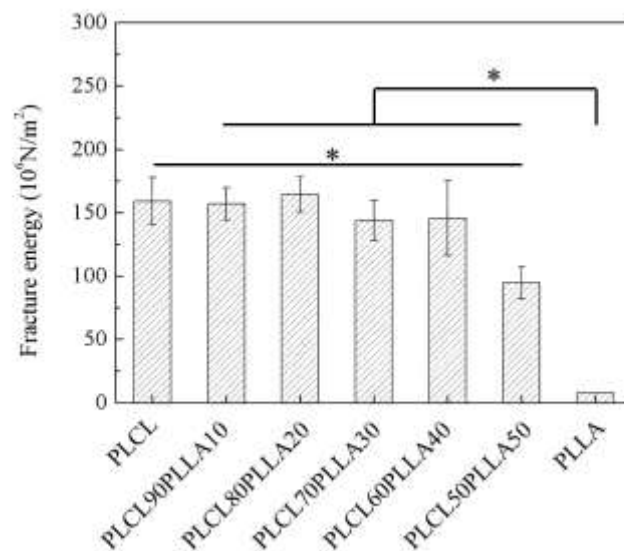

**Figure S3.** The area below stress-strain curves of PLCL/PLLA blends at different mass ratios.

The area below stress-strain curves was calculated to evaluate the fracture energy of blends based on Figure 5B, and the results showed in Figure S3. The results displayed there was no significant difference of the fracture energy between PLCL and the blends except PLCL50PLLA50, while a significant difference existed between PLLA and the blends. Therefore, the toughness of PLCL was well preserved after blending with PLLA, while the rigidity and stiffness of PLCL was increased.

**Table S2.** Mechanical properties of the 3D-printed scaffolds of PLCL/PLLA blends with different filling rate.

| Infill ratio(%) | Scaffolds    | E(MPa)       | $\sigma_{\max}$ (MPa) | $t_{1/2}$ (s)  |
|-----------------|--------------|--------------|-----------------------|----------------|
| 40%             | PLCL         | 0.52±0.07    | 0.07±0.003            | 110.62±8.24    |
|                 | PLCL90PLLA10 | 34.03±5.06   | 3.34±0.53             | 10.36±2.91     |
|                 | PLCL80PLLA20 | 45.45±2.46   | 5.06±0.92             | 17.17±0.61     |
|                 | PLCL70PLLA30 | 42.26±1.24   | 5.76±0.69             | 16.64±2.03     |
|                 | PLCL60PLLA40 | 49.37±7.42   | 5.50±2.00             | 20.48±5.04     |
|                 | PLCL50PLLA50 | 53.84±12.73  | 7.00±2.16             | 41.32±0.74     |
|                 | PLLA         | 68.84±12.31  | 3.77±1.31             | —              |
| 50%             | PLCL         | 0.76±0.04    | 0.12±0.009            | 155.13±7.60    |
|                 | PLCL90PLLA10 | 42.45±0.29   | 5.27±1.40             | 11.12±2.41     |
|                 | PLCL80PLLA20 | 51.88±4.81   | 5.82±0.47             | 17.77±2.43     |
|                 | PLCL70PLLA30 | 56.19±8.95   | 6.12±2.00             | 23.97±9.94     |
|                 | PLCL60PLLA40 | 56.73±5.44   | 6.00±1.99             | 32.79±5.20     |
|                 | PLCL50PLLA50 | 67.35±8.16   | 7.49±1.39             | 48.94±15.76    |
|                 | PLLA         | 134.69±7.70  | 17.87±1.28            | 341.64±10.13   |
| 60%             | PLCL         | 0.96±0.05    | 0.15±0.005            | 177.93±15.77   |
|                 | PLCL90PLLA10 | 54.82±1.84   | 5.51±0.88             | 16.00±1.73     |
|                 | PLCL80PLLA20 | 56.74±5.08   | 6.24±0.52             | 19.23±1.65     |
|                 | PLCL70PLLA30 | 63.81±4.50   | 6.64±0.49             | 21.27±1.15     |
|                 | PLCL60PLLA40 | 70.58±6.70   | 8.04±0.89             | 36.08±4.17     |
|                 | PLCL50PLLA50 | 81.86±4.35   | 8.81±0.12             | 49.48±7.08     |
|                 | PLLA         | 163.53±16.89 | 20.22±1.02            | 607.34±66.41   |
| 70%             | PLCL         | 1.60±0.29    | 0.27±0.046            | 170.62±14.13   |
|                 | PLCL90PLLA10 | 62.40±6.13   | 7.47±0.56             | 23.32±2.21     |
|                 | PLCL80PLLA20 | 67.89±13.41  | 6.99±1.20             | 19.81±0.66     |
|                 | PLCL70PLLA30 | 72.44±16.34  | 9.98±2.27             | 37.64±13.49    |
|                 | PLCL60PLLA40 | 76.97±6.33   | 9.80±1.37             | 40.07±4.95     |
|                 | PLCL50PLLA50 | 163.53±16.89 | 20.22±1.02            | 607.34±66.41   |
|                 | PLLA         | 228.04±20.41 | 25.27±1.94            | 1865.61±657.66 |

Note: Infill ratio, filling rate of 3D printing; E, elastic modulus;  $\sigma_{\max}$ , compressive strength;  $t_{1/2}$ , stress relaxation time.

Based on Table 5, a table was re-made to display the effect of blend ratio of PLCL/PLLA on the mechanical properties of the 3D-printed scaffolds at same filling rate (Table S2).
